# Supplementary material
Source: PubMed Central journal article supplement (PMC3040671)
Supplement: pgen.1001314.s005.pdf [file pgen.1001314.s005.pdf]

### A) Surface protein Lr\_70770

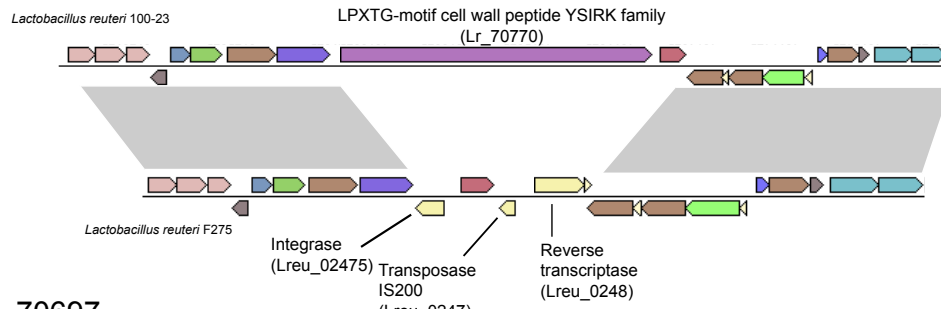

### B) Surface protein Lr\_70697

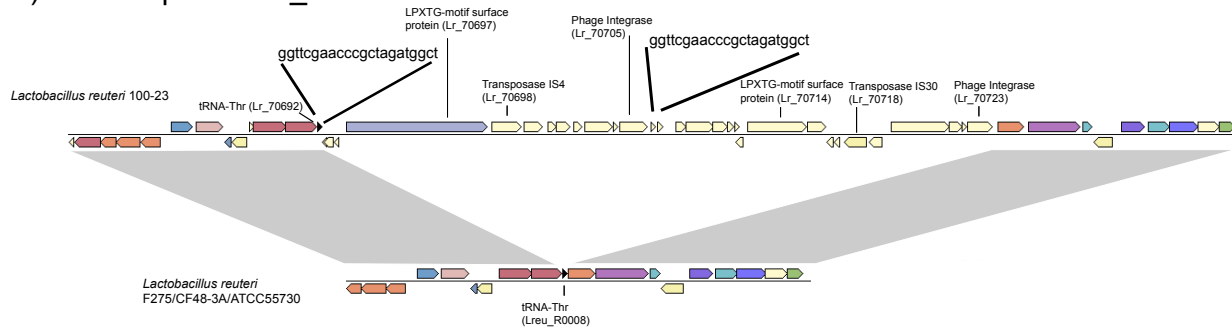

### C) Surface proteins Lr\_70131, Lr\_70134, and Lr\_70135

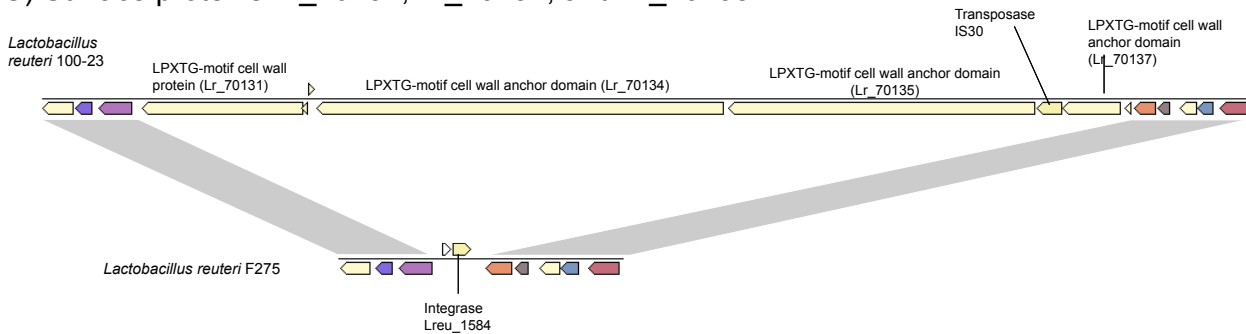

### D) Surface protein Lr\_70581

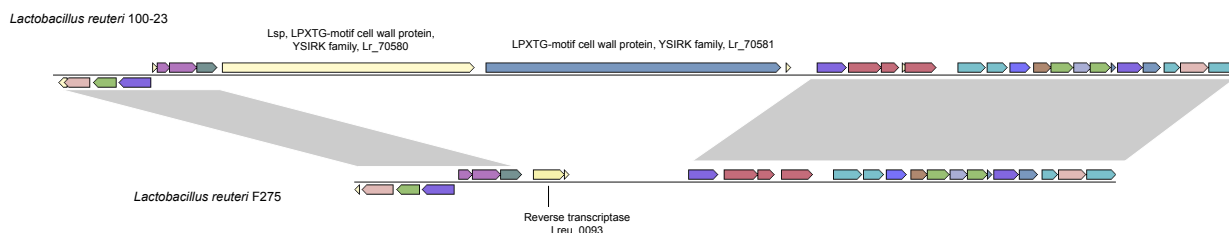

### E) Surface protein Lr\_71380

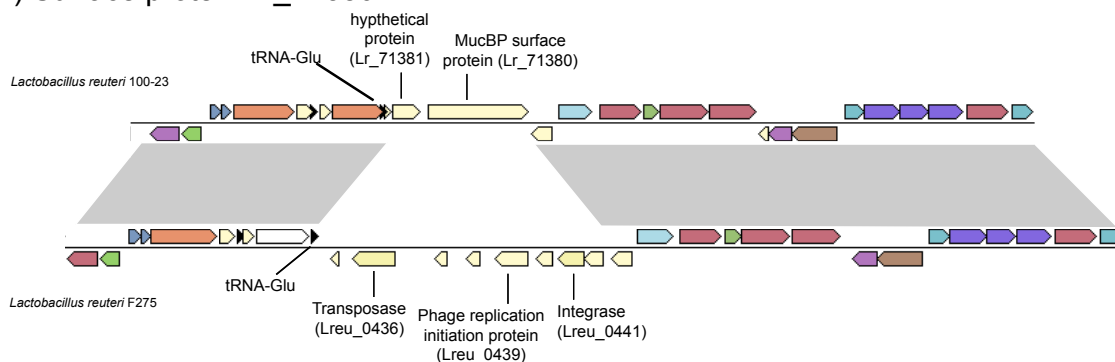

**COG Function Definition**

- RNA processing and modification
- Chromatin structure and dynamics
- Energy production and conversion
- Cell cycle control, cell division, chromosome partitioning
- Amino acid transport and metabolism
- Nucleotide transport and metabolism
- Carbohydrate transport and metabolism
- Coenzyme transport and metabolism
- Lipid transport and metabolism
- Translation, ribosomal structure and biogenesis
- Transcription
- Replication, recombination and repair
- Cell wall/membrane/envelope biogenesis
- Cell motility
- Posttranslational modification, protein turnover, chaperones
- Inorganic ion transport and metabolism
- Secondary metabolites biosynthesis, transport and catabolism
- General function prediction only
- Function unknown
- Signal transduction mechanisms
- Intracellular trafficking, secretion, and vesicular transport
- Defense mechanisms
- Extracellular structures
- Nuclear structure
- Cytoskeleton
