# Supplementary material
Source: PubMed Central journal article supplement (PMC3040671)

175000 350000 525000 700000 875000 1050000 1225000 1400000 1575000 1750000 1925000 2100000 2275000

100-23

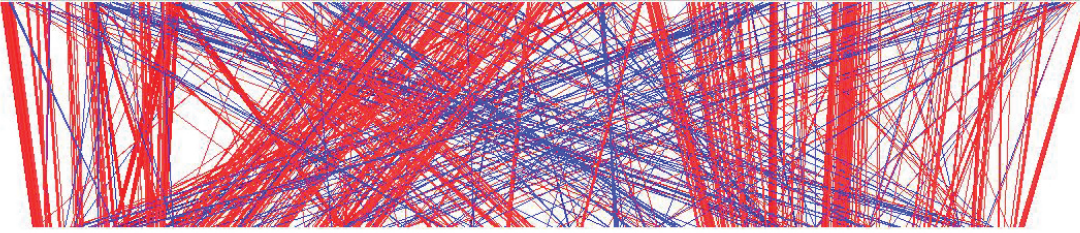

175000 350000 525000 700000 875000 1050000 1225000 1400000 1575000 1750000 1925000

*Lactobacillus  
fermentum*  
IFO3956

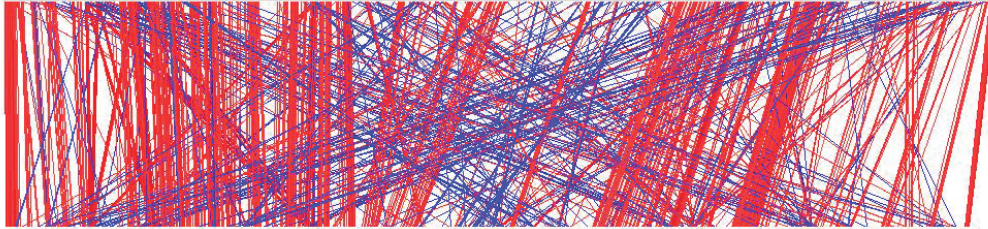

175000 350000 525000 700000 875000 1050000 1225000 1400000 1575000 1750000 1925000

F275

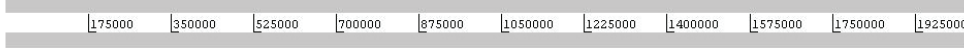

Supplement: pgen.1001314.s001.pdf [file pgen.1001314.s001.pdf]

# SPS 1

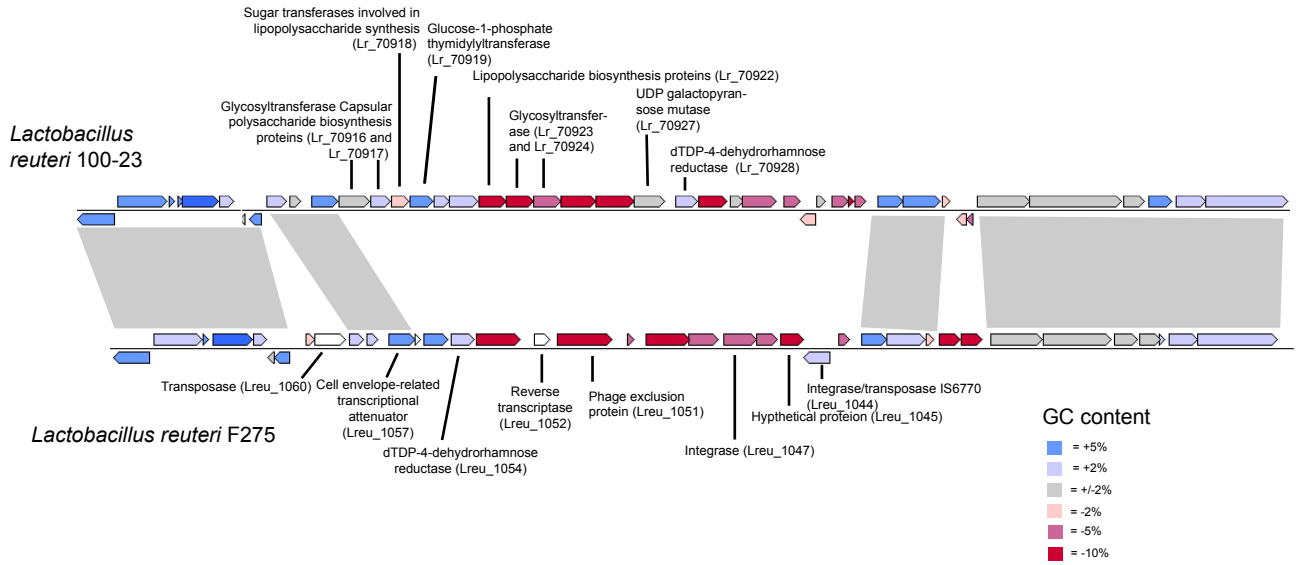

# SPS 2

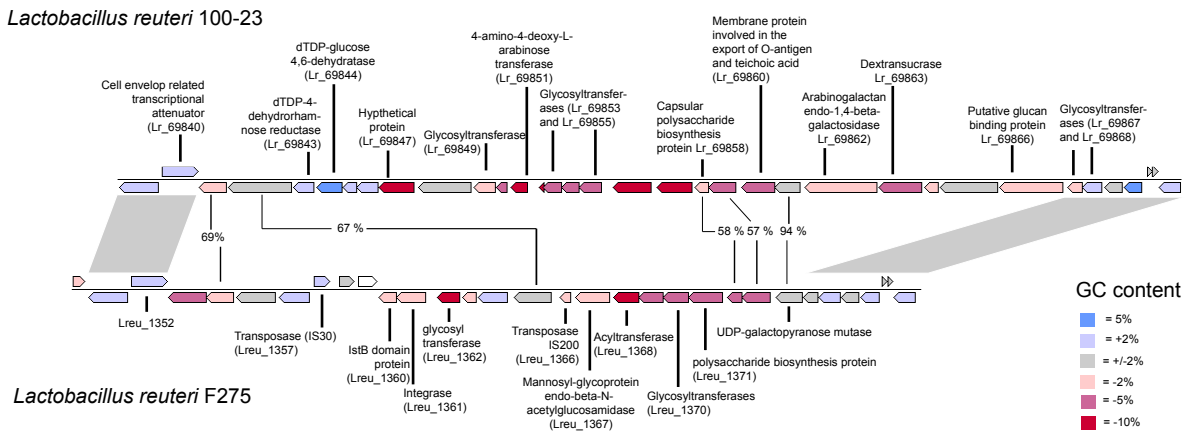

Supplement: pgen.1001314.s003.pdf [file pgen.1001314.s003.pdf]

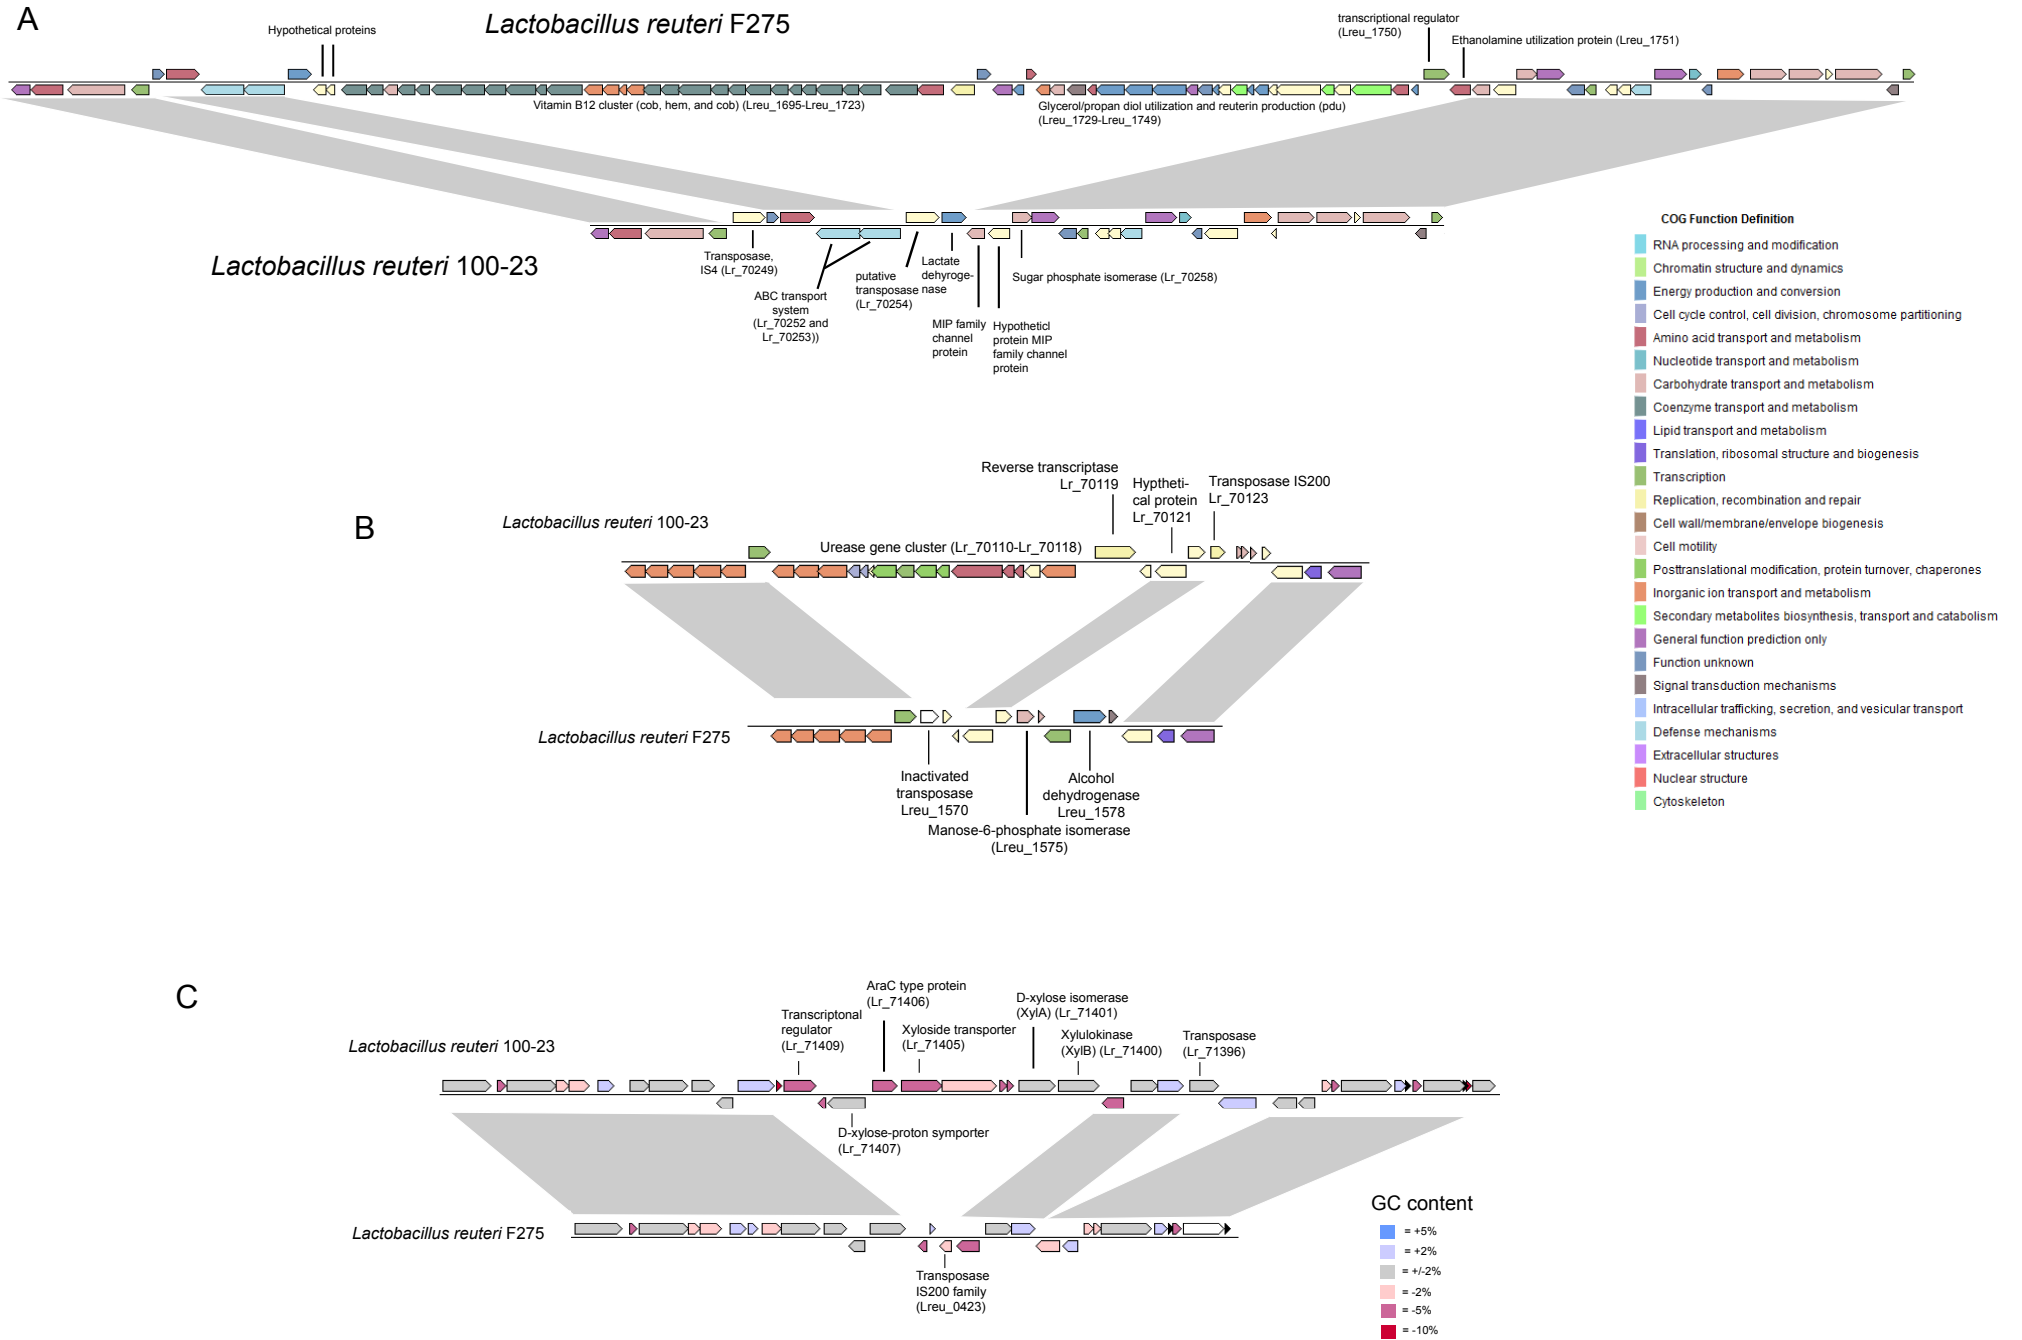

Supplement: pgen.1001314.s004.pdf [file pgen.1001314.s004.pdf]
